# Supplementary material
Source: PubMed Central journal article supplement (PMC7254805)
Supplement: ao0c00786_si_001.pdf [file ao0c00786_si_001.pdf]

# Potent HCV NS3 Protease Inhibition by a Water-Soluble Phyllanthin

## Congener

Uma Reddy B,<sup>†</sup> Himani Tandon,<sup>‡</sup> Manoj K. Pradhan,<sup>§</sup> Harikrishnan Adhikesavan,<sup>§</sup>

Narayanaswamy Srinivasan,<sup>\*,§</sup> Saumitra Das,<sup>\*,†,§</sup> Narayanaswamy Jayaraman<sup>\*,§</sup>

<sup>†</sup> Microbiology and Cell Biology, <sup>‡</sup>Molecular Biophysics Unit, <sup>§</sup>Department of Organic Chemistry, Indian Institute of Science, Bangalore 560 012, India. <sup>§</sup>National Institute of Biomedical Genomics, Kalyani 741 251, India.

---

### Supporting Information

| Content                                                                                                 | Page |
|---------------------------------------------------------------------------------------------------------|------|
| <b>Figure S1.</b> <sup>1</sup> H NMR spectrum of D7                                                     | 2    |
| <b>Figure S2.</b> <sup>13</sup> C NMR spectrum of D7                                                    | 2    |
| <b>Figure S3.</b> <sup>1</sup> H NMR spectrum of D8                                                     | 3    |
| <b>Figure S4.</b> <sup>13</sup> C NMR spectrum of D8                                                    | 3    |
| <b>Figure S5.</b> <sup>1</sup> H NMR spectrum of D9                                                     | 4    |
| <b>Figure S6.</b> <sup>13</sup> C NMR spectrum of D9                                                    | 4    |
| <b>Figure S7.</b> <i>In-vivo</i> toxicity of D8 administered <i>via</i> different modes in BALB/c mice. | 5    |

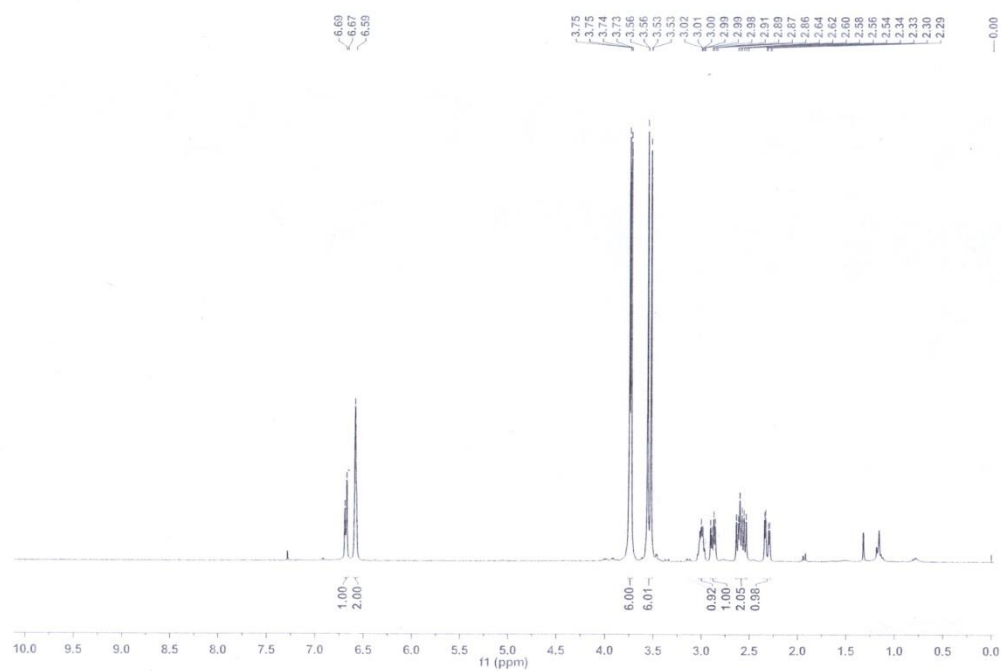

**Figure S1.**  $^1\text{H}$  NMR spectrum of D7 ( $\text{CDCl}_3$ , 400 MHz).

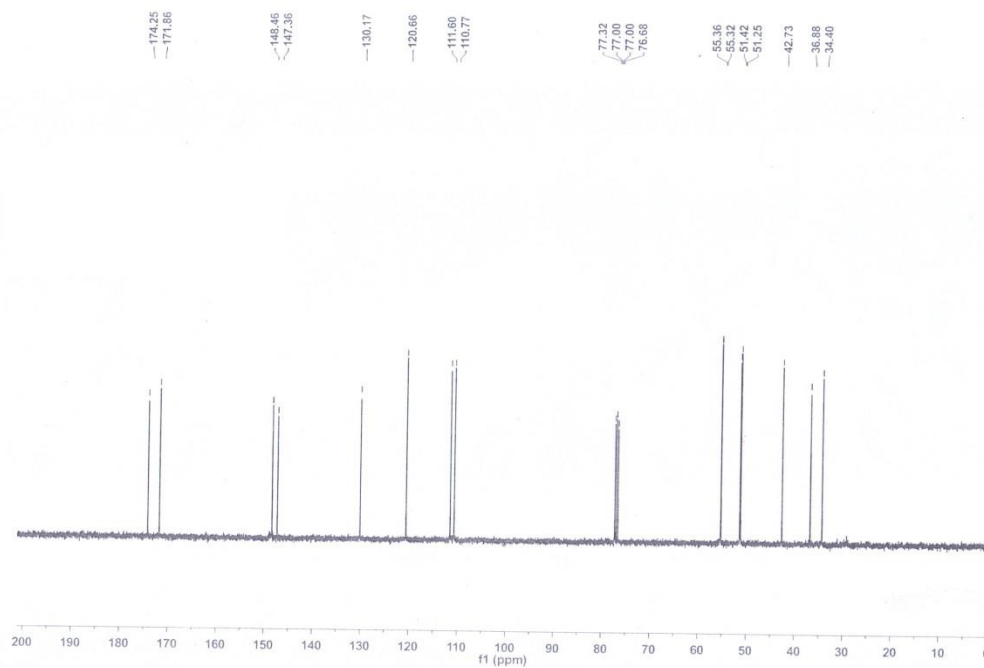

**Figure S2.**  $^{13}\text{C}$  NMR spectrum of D7 ( $\text{CDCl}_3$ , 400 MHz).

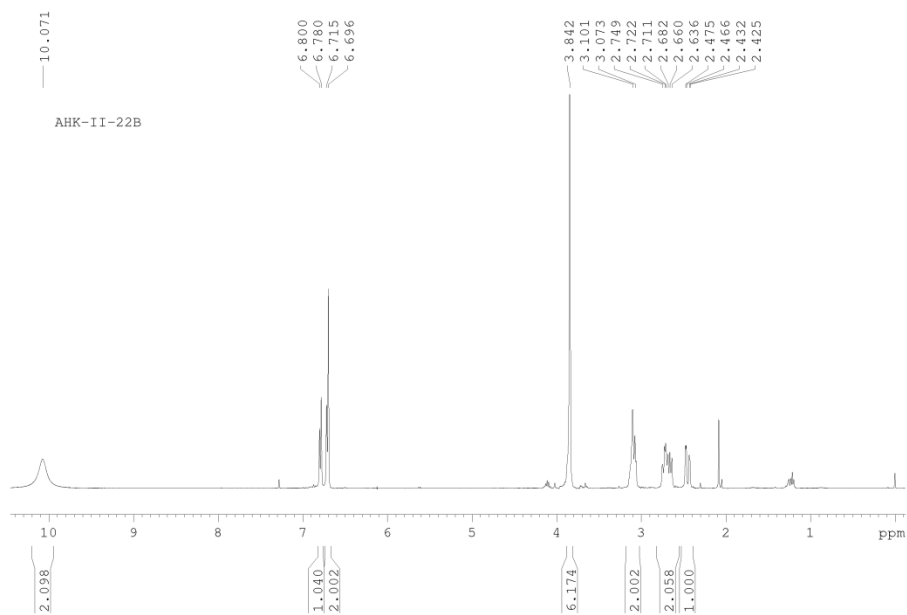

**Figure S3.**  $^1\text{H}$  NMR spectrum of D8 ( $\text{CDCl}_3$ , 400 MHz).

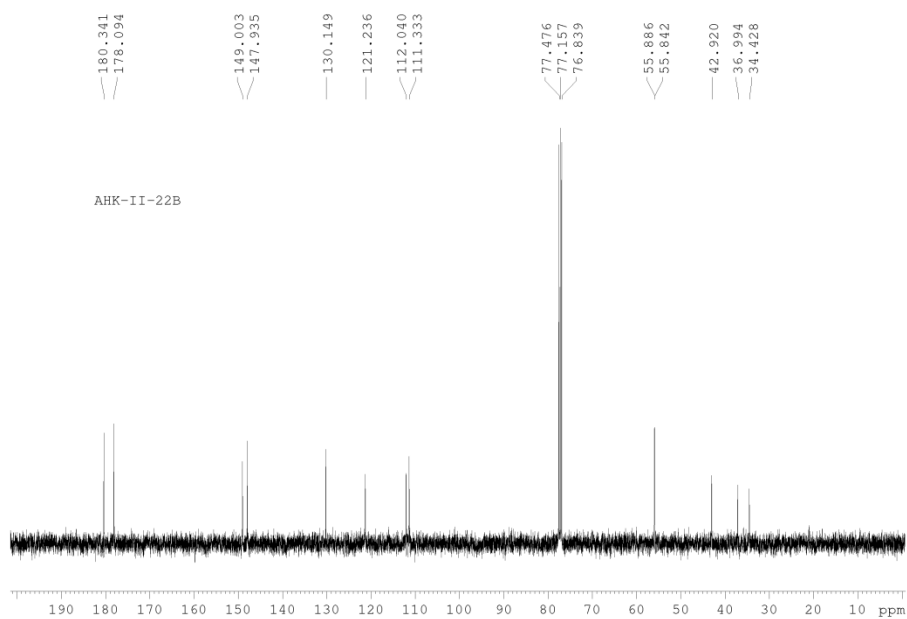

**Figure S4.**  $^{13}\text{C}$  NMR spectrum of D8 ( $\text{CDCl}_3$ , 400 MHz).

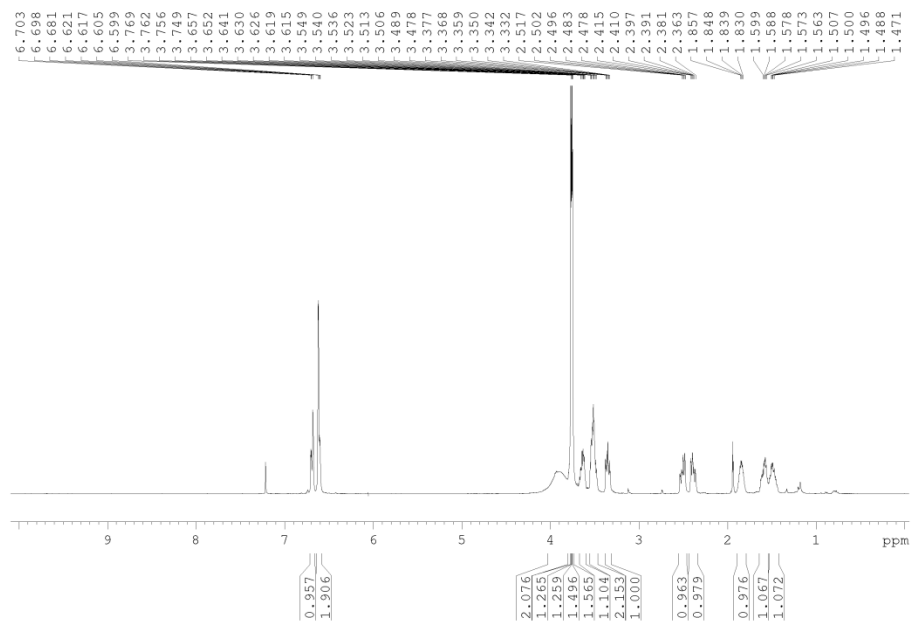

**Figure S5.**  $^1\text{H}$  NMR spectrum of D9 ( $\text{CDCl}_3$ , 400 MHz).

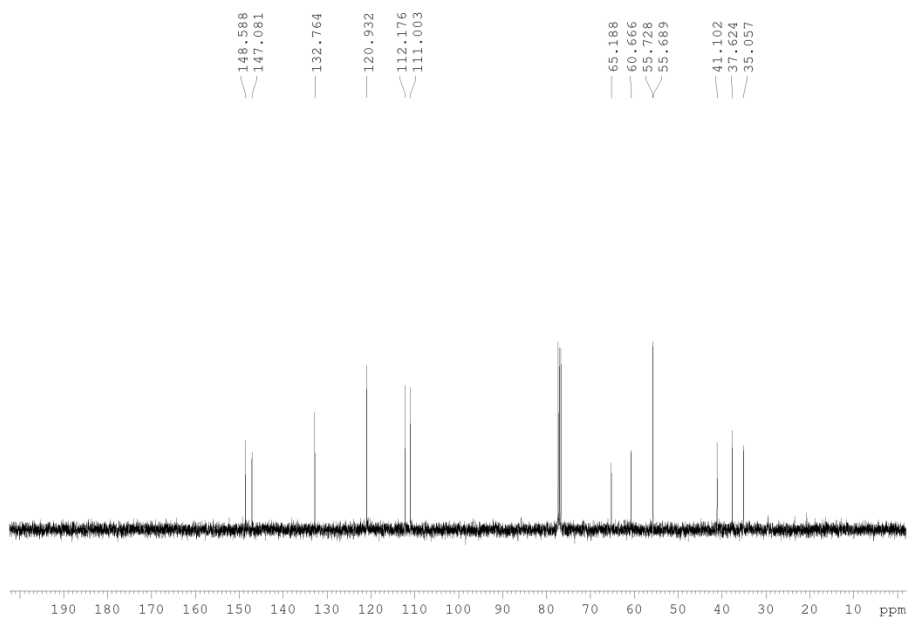

**Figure S6.**  $^{13}\text{C}$  NMR spectrum of D9 ( $\text{CDCl}_3$ , 400 MHz).

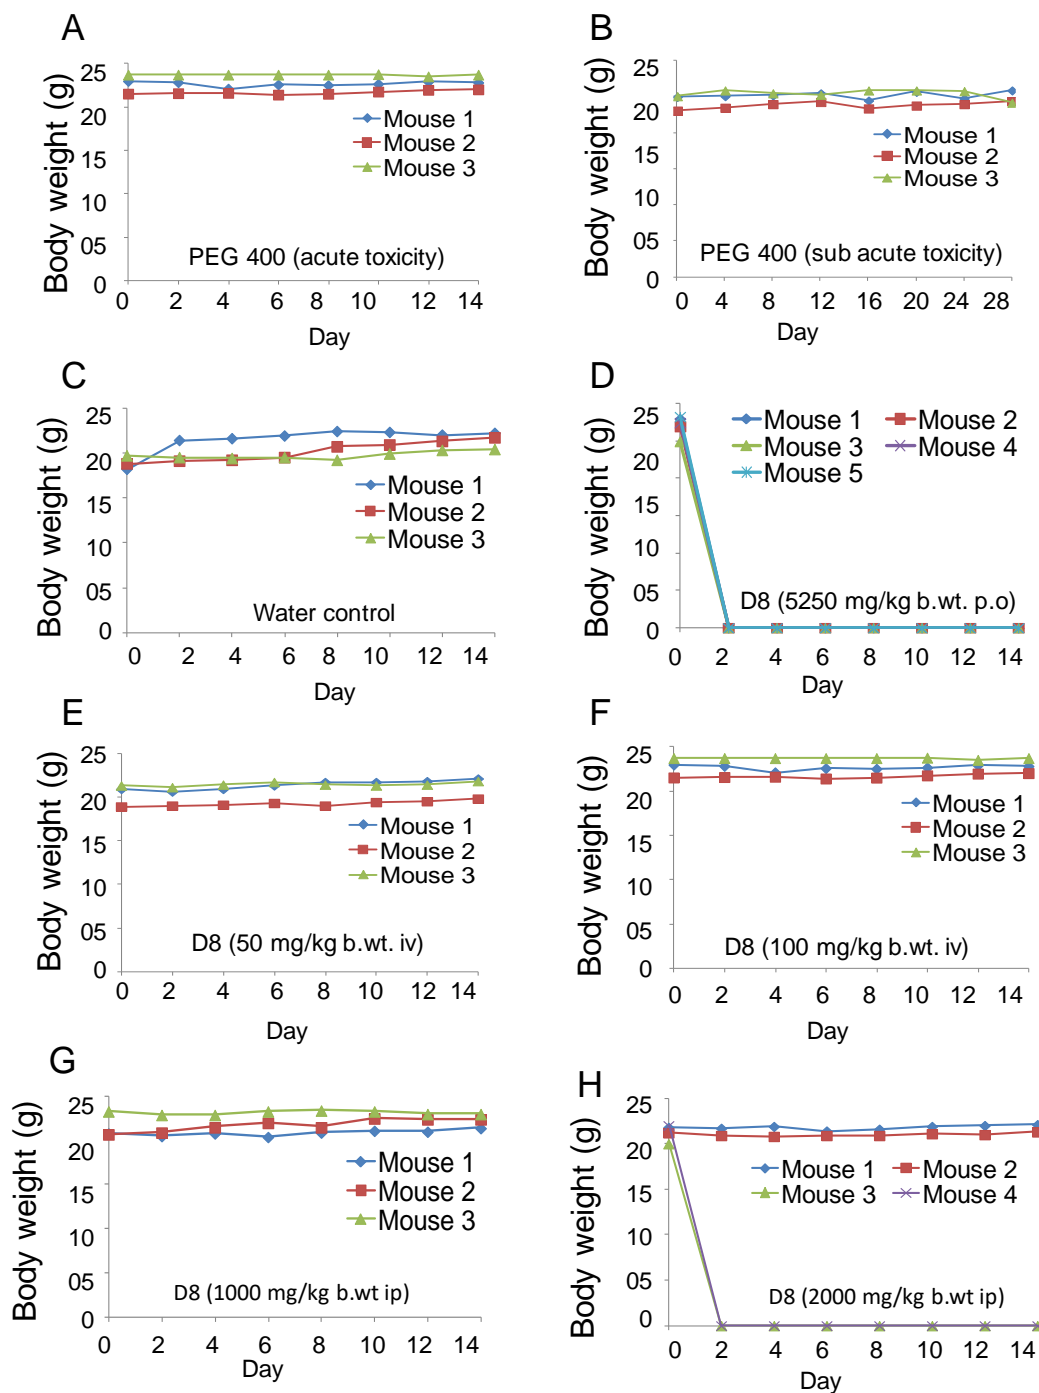

**Figure S7.** *In-vivo* toxicity of D8 administered *via* different modes in BALB/c mice. The dose and mode of administration of compounds also number of mice used in each group for study is shown within the respective figures (A-H) (p.o = oral, ip = intraperitoneal, iv= intravenous). The body weight, general behaviour, maximum tolerance dose and percentage of mortality of compounds was recorded for each treatment group. (Note: There is a sudden drop in the bodyweights of mice to zero indicating the occurrence of death of the animals).
